# Supplementary material for: The Aachen ACLF ICU score predicts ICU mortality in critically ill patients with acute-on-chronic liver failure
Source: PubMed Central journal article supplement (PMC11649908; doi:10.1038/s41598-024-82178-0), 2024-12-16
Supplement: 41598_2024_82178_MOESM1_ESM.pdf [file 41598_2024_82178_MOESM1_ESM.pdf]

1 **Supplementary**2 **The Aachen ACLF ICU score predicts ICU mortality in critically ill**  
3 **patients with acute-on-chronic liver failure**

4

5 Maïke Rebecca Pollmanns<sup>1</sup>, Bastian Kister<sup>2</sup>, Samira Abu Jhaisha<sup>1</sup>, Jule K. Adams<sup>1</sup>,  
6 Elena Kabak<sup>1</sup>, Jonathan Frederik Brozat<sup>1, 3</sup>, Carolin Victoria Schneider<sup>1</sup>, Philipp  
7 Hohlstein<sup>1</sup>, Tony Bruns<sup>1</sup>, Lars K pfer<sup>2</sup>, Christian Trautwein<sup>1, 4</sup>, Alexander Koch<sup>1,\*</sup>,  
8 Theresa Hildegard Wirtz<sup>1,\*</sup>

9

10 **Table of contents**11 **Table S1:** Additional baseline characteristics of ICU survivors vs. ICU non-survivors12 **Table S2:** Comparison of different decision tree models with logistic regression models13 **Table S3:** Comparison of the performance of the generated logistic regression models14 **Table S4:** Calculation of ACICU score in two exemplary patients15 **Table S5:** Correlation analysis of the features of the ACICU Score16 **Table S6:** Comparison of ACICU and CLIF-C ACLF score17 **Figure S1:** ACICU Score validation18 **Figure S2:** ACICU Score in ACLF patients not receiving liver transplantation19 **Figure S3:** ACICU Score in ACLF patients receiving liver transplantation

20

21 **Suppl. Table S1: Additional baseline characteristics of ICU survivors vs. ICU**  
22 **non-survivors**

|                                    | All Patients          | ICU survivors         | ICU non-survivors     | p-Value |
|------------------------------------|-----------------------|-----------------------|-----------------------|---------|
| <b>Characteristics</b>             |                       |                       |                       |         |
| Diabetes mellitus, yes (%)         | 55 (27)               | 26 (32)               | 29 (24)               | 0.186   |
| <b>Laboratory parameters</b>       |                       |                       |                       |         |
| WBC [n/nl], median (range)         | 13.7 (0.9 – 49.9)     | 11.94 (2.6 – 49.9)    | 14.9 (0.9 – 41.9)     | 0.004   |
| Hb [g/dl], median (range)          | 8.97 (1.5 – 17.5)     | 8.94 (3.9 – 16.15)    | 8.98 (1.5 – 17.5)     | 0.643   |
| PLT [n/nl], median (range)         | 94.13 (7.0 – 394.0)   | 101.7 (21 – 386)      | 89.1 (7 – 394)        | 0.166   |
| AT III (%), median (range)         | 22.48 (2.0 – 65)      | 28.6 (4 – 59)<br>n=41 | 20.2 (2 – 65)<br>n=41 | 0.099   |
| Fibrinogen [mg/dl], median (range) | 138.46 (21.0 – 538.0) | 132.2 (46 – 253)      | 140.7 (21 – 538)      | 0.823   |

|                                                      |                         |                          |                           |          |
|------------------------------------------------------|-------------------------|--------------------------|---------------------------|----------|
| eGFR [ml/min/1,73m <sup>2</sup> ], median (range)    | 40.0 (4.4 – 163.3)      | 45.9 (6.0 – 163.3)       | 36.05 (4.4 – 130.1)       | 0.240    |
| AST [U/l], median (range)                            | 653.3 (13 – 17398)      | 393.3 (13 – 16294)       | 827.6 (13 – 17398)        | < 0.0001 |
| ALT [U/l], median (range)                            | 264.43 (5 – 6886)       | 186.38 (7 – 6886)        | 316.47 (5 – 6030)         | 0.021    |
| Albumin [g/dl], median (range)                       | 2.77 (1.10 – 5.10)      | 2.95 (1.70 – 5.10)       | 2.65 (1.1 – 4.7)          | 0.009    |
| Ammonia [μmol/l], median (range)                     | 88.7 (10 – 418)         | 78.6 (10 – 328)          | 94.8 (10 – 418)           | 0.078    |
| LDH [U/l], median (range)                            | 630.7 (68 – 12194)      | 448.5 (82 – 11585)       | 753.1 (68 – 12194)        | 0.004    |
| Na <sup>+</sup> [mmol/l], median (range)             | 137 (108 – 163)         | 137 (123 – 156)          | 137 (108 – 163)           | 0.906    |
| K <sup>+</sup> [mmol/l], median (range)              | 4.53 (2.7 – 7.7)        | 4.53 (3.1 – 7.7)         | 4.52 (2.7 – 6.6)          | 0.722    |
| BNP [pg/ml], median (range)                          | 6192.64 (8.3 – 43935.0) | 6107.36 (25.3 – 43935.0) | 6248.01 (8.3 – 42757.0)   | 0.048    |
| CRP [mg/l], median (range)                           | 56.6 (1.7 – 245.2)      | 49.1 (2.4 – 244.6)       | 61.6 (1.7 – 245.2)        | 0.060    |
| PCT [ng/ml], median (range)                          | 4.38 (0.07 – 64.42)     | 4.71 (0.07 – 63.18)      | 4.17 (0.09 – 64.42)       | 0.025    |
| Il-6 [pg/ml], median (range)                         | 4108 (9.6 – 136014.0)   | 1067.5 (9.6 – 15234.0)   | 6168.5 (20.63 – 136014.0) | 0.007    |
| <b>Reason for decompensation of cirrhosis</b>        |                         |                          |                           |          |
| Bleeding, n (%)                                      | 48 (23)                 | 24 (30)                  | 24 (20)                   | 0.099    |
| Sepsis, n (%)                                        | 115 (56)                | 33 (40)                  | 82 (66)                   | < 0.0001 |
| SBP, n (%)                                           | 44 (22)                 | 13 (16)                  | 31 (25)                   | 0.282    |
| pulmonary, n (%)                                     | 47 (23)                 | 10 (12)                  | 37 (30)                   | 0.003    |
| <b>ICU Data at the day of admission</b>              |                         |                          |                           |          |
| <i>Ventilation Data</i>                              |                         |                          |                           |          |
| mechanical ventilation, yes (%)                      | 101 (49)                | 23 (28)                  | 78 (63)                   | 0.0001   |
| RF [n/min], median (range)                           | 19 (7 – 55)             | 18 (7- 29)               | 20 (11 – 33)              | 0.024    |
| p <sub>a</sub> O <sub>2</sub> [mmHg], median (range) | 87 (42 – 156)           | 89 (42 – 156)            | 85 (49 – 146)             | 0.421    |
| PEEP [cm H <sub>2</sub> O], median (range)           | 8.5 (5 – 15)            | 8.1 (5 – 15)             | 8.57 (5 – 15)             | 0.309    |
| P <sub>insp</sub> [mbar], median (range)             | 22 (8 – 32)             | 19 (8 – 30)              | 23 (12 – 32)              | 0.007    |
| <i>Renal replacement data</i>                        |                         |                          |                           |          |
| Renal replacement therapy, yes (%)                   | 87 (42)                 | 24 (30)                  | 63 (51)                   | 0.002    |

- 1 Baseline patient characteristics at the time point of admission to ICU. For quantitative
- 2 variables median and range (in parentheses) are given. *Abbreviations are:* WBC, white
- 3 blood cell count; Hb, hemoglobin; PLT, platelet; AT III, antithrombin III; GFR,

1 glomerular filtration rate; AST, aspartate aminotransferase; ALT, alanine  
 2 transaminase; LDH, lactic acid dehydrogenase; BNP, brain natriuretic peptide; CRP,  
 3 C-reactive protein; PCT, procalcitonin; IL-6, interleukin-6; SBP, spontaneous bacterial  
 4 peritonitis; RF, respiratory frequency; PEEP, positive end-expiratory pressure.

5  
 6 **Suppl. Table S2: Comparison of different decision tree models with logistic**  
 7 **regression models**

|                                                      | T<br>a<br>r<br>g<br>e<br>t | CLIF – L1 -<br>L2    | Tree 1               | Tree 2               | Tree 3               | Tree 4           |
|------------------------------------------------------|----------------------------|----------------------|----------------------|----------------------|----------------------|------------------|
| <b>Input<br/>featu<br/>res</b>                       |                            |                      | all                  | R+C                  | All + CLIF-C<br>ACLF | Model 6/7        |
| <b>Preci<br/>sion</b>                                | 1                          | 0.91 (0.84-<br>0.96) | 0.66 (0.60-<br>0.70) | 0.81 (0.85-<br>0.79) | 0.74 (0.69-0.77)     | 0.67 (0.59-0.72) |
| <b>Sens<br/>itivit<br/>y</b>                         | 1                          | 0.90 (0.94-<br>0.88) | 0.67 (0.53-<br>0.76) | 0.81 (0.65-<br>0.92) | 0.74 (0.65-0.80)     | 0.67 (0.59-0.72) |
| <b>F1-<br/>scor<br/>e</b>                            | 1                          | 0.91 (0.89-<br>0.92) | 0.66 (0.56-<br>0.73) | 0.80 (0.73-<br>0.85) | 0.74 (0.67-0.78)     | 0.67 (0.59-0.72) |
| <b>Calib<br/>ratio<br/>n-in-<br/>the-<br/>large</b>  | 0.6                        | 0.5                  | 0.64                 | 0.67                 | 0.62                 | 0.61             |
| <b>AUR<br/>OC</b>                                    | 1                          | 0.95                 | 0.64                 | 0.8                  | 0.71                 | 0.67             |
| <b>Youd<br/>en's<br/>J</b>                           |                            | 0.50                 | 1.00                 | 0.75                 | 1.00                 | 0.25             |
| <b>Num<br/>ber<br/>of<br/>used<br/>featu<br/>res</b> |                            | 13                   | 67                   | 16                   | 68                   | 13               |

8 Evaluated tree models in comparison to the first logistic regression model. In the first  
 9 step all features were evaluated, in the second step features related to organ failures  
 10 were tested. *Abbreviations are:* CLIF, Chronic Liver Failure Consortium (CLIF-C) ACLF  
 11 score; NOF, number of organ failures; L1, Lasso Regression; L2, Ridge Regression.

- 1 **Suppl. Table S3: Comparison of the performance of the generated logistic regression models.** Input features were related to  
 2 organ failures, addition of the number of organ failures (NOF) was also tested.

| Model number             |     | Model 1                                                | Model 2                                         | Model 3                                         | Model 4                                                    | Model 5 (ACICU Score)                             | Model 6                                                                                                   | Model 7                                                    |
|--------------------------|-----|--------------------------------------------------------|-------------------------------------------------|-------------------------------------------------|------------------------------------------------------------|---------------------------------------------------|-----------------------------------------------------------------------------------------------------------|------------------------------------------------------------|
| Regularization           |     | L1                                                     | L1 -> L2                                        | L1                                              | L2                                                         | L2                                                | L1                                                                                                        | L2                                                         |
| Precision                | 1   | 0.84 (0.75 – 0.91)                                     | 0.9 (0.88 – 0.92)                               | 0.9 (0.88 – 0.92)                               | 0.9 (0.88 – 0.92)                                          | 0.95 (0.94 – 0.96)                                | 0.89 (0.80 – 0.95)                                                                                        | 0.88 (0.76 – 0.95)                                         |
| Sensitivity              | 1   | 0.83 (0.80 – 0.88)                                     | 0.9 (0.88 – 0.92)                               | 0.9 (0.88 – 0.92)                               | 0.9 (0.88 – 0.92)                                          | 0.95 (0.94 – 0.96)                                | 0.88 (0.84 – 0.94)                                                                                        | 0.86 (0.94 – 0.80)                                         |
| F1-score                 | 1   | 0.83 (0.81 – 0.85)                                     | 0.9 (0.88 – 0.92)                               | 0.9 (0.88 – 0.92)                               | 0.9 (0.88 – 0.92)                                          | 0.95 (0.94 – 0.96)                                | 0.88 (0.86 – 0.89)                                                                                        | 0.86 (0.84 – 0.87)                                         |
| Calibration-in-the-large | 0.6 | 0.57                                                   | 0.6                                             | 0.5393                                          | 0.5952                                                     | 0.58                                              | 0.535                                                                                                     | 0.50                                                       |
| Calibration intercept    | 0   | 0.03                                                   | - 0.04                                          | 0.2192                                          | - 0.04                                                     | - 0.216                                           | 0.56                                                                                                      | 0.8833                                                     |
| Calibration slope        | 1   | 3.22                                                   | 1.81                                            | 3.7                                             | 1.8095                                                     | 2.7046                                            | 1.59                                                                                                      | 243.32                                                     |
| AUROC                    | 1   | 0.93                                                   | 0.95                                            | 0.94                                            | 0.95                                                       | 0.96                                              | 0.91                                                                                                      | 0.95                                                       |
| Youden's J               |     | 0.49                                                   | 0.47                                            | 0.53                                            | 0.47                                                       | 0.54                                              | 0.41                                                                                                      | 0.50                                                       |
| Number of used features  |     | 8                                                      | 5                                               | 5                                               | 5                                                          | 5                                                 | 13                                                                                                        | 13                                                         |
| Features                 |     | 'd1_Horowitz', 'd1_FiO2', 'd1_paO2', 'd1_Ventilation', | 'd1_CLIF_C_AC', 'LF', 'd1_Horowitz', 'd1_FiO2', | 'd1_CLIF_C_AC', 'LF', 'd1_Horowitz', 'd1_FiO2', | 'd1_CLIF_C_AC', 'LF', 'd1_Horowitz', 'd1_FiO2', 'd1_TPTD', | 'd1_CLIF_C_AC', 'LF', 'Number_OF', 'd1_Horowitz', | 'Number_OF', 'd1_AF', 'd1_Horowitz', 'd1_FiO2', 'd1_paO2', 'd1_Ventilation', 'cause of sepsis', 'd1_MAP', | 'Number_OF', 'd1_AF', 'd1_Horowitz', 'd1_FiO2', 'd1_paO2', |

|                          | 'd1_MAP',<br>'d1_TPTD',<br>'d1_RR_Sys',<br>'d1_Lactate'                                                                    | 'd1_TPTD, 'd1_<br>Lactate'                                         | 'd1_TPTD, 'd1_<br>Lactate'                                          | 'd1_Lactate'                                                       | 'd1_FiO2', 'd1_<br>Lactate'                                         | 'd1_vasopressors', 'd1_<br>TPTD, 'd1_heart rate',<br>'d1_RR_Sys', 'd1_<br>Lactate'                                                                                                  | 'd1_Ventilatio<br>n', cause of<br>sepsis',<br>'d1_MAP',<br>'d1_vasopress<br>os',<br>'d1_TPTD',<br>'d1_heart<br>rate',<br>'d1_RR_Sys',<br>'d1_Lactate'                                  |
|--------------------------|----------------------------------------------------------------------------------------------------------------------------|--------------------------------------------------------------------|---------------------------------------------------------------------|--------------------------------------------------------------------|---------------------------------------------------------------------|-------------------------------------------------------------------------------------------------------------------------------------------------------------------------------------|----------------------------------------------------------------------------------------------------------------------------------------------------------------------------------------|
| <b>Coefficient<br/>s</b> | -0.3472606<br>0.21422031<br>-<br>0.03058471<br>0.07092862<br>-<br>0.16473165<br>0.25087789<br>-<br>0.05219007<br>0.2849164 | 0.7937202<br>-0.30231107<br>0.28361903<br>0.44091147<br>0.29946303 | 0.49873336<br>-0.21536315<br>0.06984075<br>0.08288953<br>0.05421657 | 0.7937202<br>-0.30231107<br>0.28361903<br>0.44091147<br>0.29946303 | 0.65130518<br>0.14880095<br>-0.29750186<br>0.26440165<br>0.35542168 | 0.42208604<br>0.02775644<br>0.23321895<br>0.82631475<br>-0.5261933<br>0.3846778<br>0.05338636<br>-0.3745731<br>-0.20863558<br>0.37922956<br>0.08786658<br>-0.09197543<br>0.40577534 | 0.00247497<br>0.00097648<br>-0.00284844<br>0.00274555<br>-0.00052981<br>0.00226619<br>0.00126243<br>-0.00120199<br>0.00181572<br>0.00190038<br>0.00104307<br>-0.00096393<br>0.00204423 |

- 1 Used formula for logistic regression as described in Material and Methods. Performance and calibration of the validation cohort are
- 2 described in the upper part of the table.  $X_n$  refers to the features,  $\beta_n$  refers to the coefficients. *Abbreviations are:* CLIF, Chronic Liver

- 1 Failure Consortium (CLIF-C) ACLF score; NOF, number of organ failures; L1, Lasso Regression; L2, Ridge Regression; TPTD,
- 2 Transpulmonary Thermodilution

1 **Suppl. Table S4: Calculation of ACICU score in two exemplary patients**

|                                            | Patient 1 | Patient 2 |
|--------------------------------------------|-----------|-----------|
| <b>CLIF-C ACLFs</b>                        | 52        | 59        |
| <b>Horovitz [mmHg]</b>                     | 485       | 168       |
| <b>FiO<sub>2</sub> [%]</b>                 | 21        | 70        |
| <b>Number of Organ Failures</b>            | 2         | 3         |
| <b>Lactate [mmol/l]</b>                    | 0.9       | 8.5       |
| <b>ACICU score</b>                         | 0.2       | 0.8       |
| <b>Risk group</b>                          | Low risk  | High risk |
| <b>Estimated risk of ICU mortality [%]</b> | 24        | 82        |

2 Patient 1 representing a low risk patient, patient 2 representing a high risk patient with  
3 ACLF. *Abbreviations are:* CLIF-C ACLFs, Chronic Liver Failure Consortium (CLIF-C)  
4 ACLF score.

5

6 **Suppl. Table S5: Correlation analysis of the features of the ACICU score**

|                        | CLIF-C ACLF | NOF        | Horovitz   | FiO <sub>2</sub> | Lactate    |
|------------------------|-------------|------------|------------|------------------|------------|
| <b>CLIF-C ACLF</b>     | 1.000000    | 0.618330   | - 0.375265 | 0.367614         | 0.316619   |
| <b>NOF</b>             | 0.618330    | 1.000000   | - 0.354321 | 0.359048         | 0.242783   |
| <b>Horovitz</b>        | - 0.375265  | - 0.354321 | 1.000000   | - 0.822832       | - 0.255031 |
| <b>FiO<sub>2</sub></b> | 0.367614    | 0.359048   | - 0.822832 | 1.000000         | 0.339996   |
| <b>Lactate</b>         | 0.316619    | 0.242783   | - 0.255031 | 0.339996         | 1.000000   |

7 Correlation analysis showing pairwise the Pearson coefficients. *Abbreviations are:*  
8 CLIF-C ACLF: CLIF, Chronic Liver Failure Consortium (CLIF-C) ACLF score; NOF,  
9 number of organ failures

10

11 **Suppl. Table S6: Comparison of ACICU and CLIF-C ACLF score**

|                         |         | ICU survivors (n=82)<br>(%) | ICU non-survivors<br>(n=124) (%) |
|-------------------------|---------|-----------------------------|----------------------------------|
| <b>CLIF-C ACLF ≥ 70</b> | Yes (%) | 4 (12.1)                    | <b>29 (23.4)</b>                 |
|                         | No (%)  | <b>78 (95.1)</b>            | 95 (76.6)                        |
| <b>ACICU ≥ 0.94</b>     | Yes (%) | 0 (0)                       | <b>9 (7.3)</b>                   |
|                         | No (%)  | <b>82 (100)</b>             | 115 (92.7)                       |

1 Analysis of performance metrics of true and false classification of patients who do or  
2 do not survive ICU by the respective thresholds of CLIF-C ACLFs of 70 and ACICU  
3 score of 0.94. Percentages in the parentheses refer to the true survival status; number  
4 and percentage of truly classified patients are in bold.

5



1 **Suppl. Figure S1: ACICU score validation**

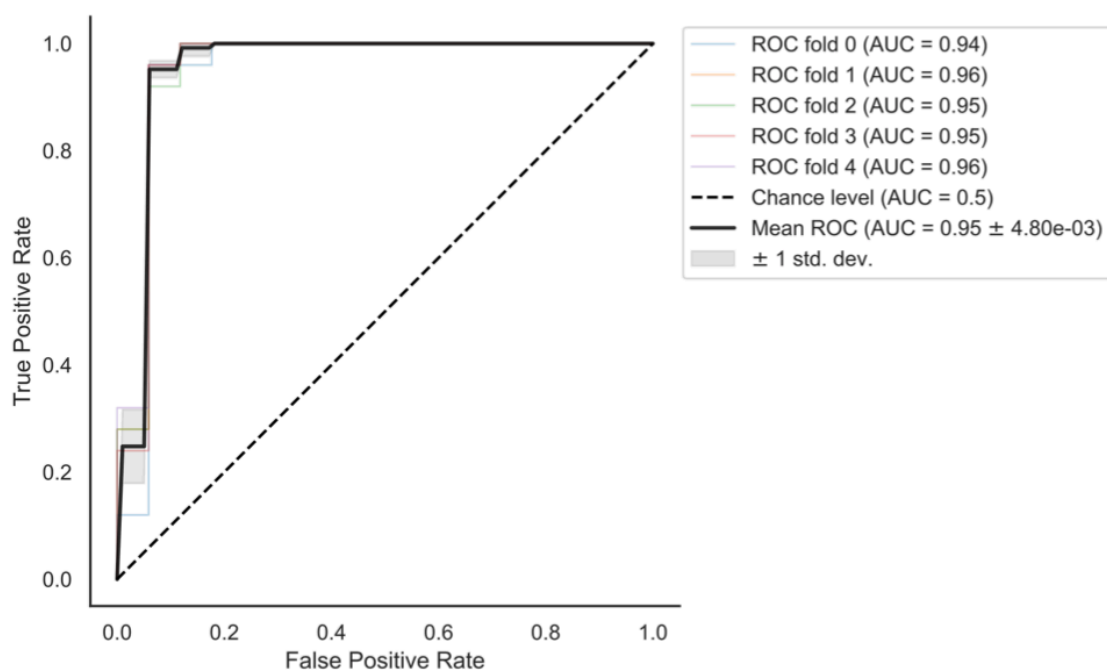

2  
3 Receiver operating characteristics of the ACICU score (mean AUROC=0.95) in 5-fold  
4 cross- validation in test cohort.

5  
6 **Suppl. Figure S2: ACICU score in patients with ACLF without OLT**

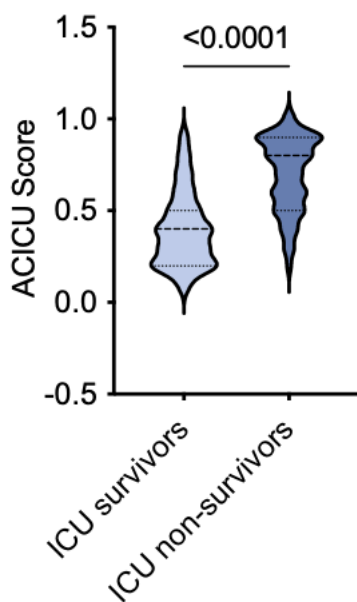

7  
8 Comparison of ACICU score values between ICU survivors vs. ICU non-survivors after  
9 exclusion of patients who received OLT (68 vs. 119 patients),  $p < 0.0001$ . An unpaired,  
10 two-tailed t-test was used.

1

2 **Suppl. Figure S3: ACICU score in patients with ACLF receiving OLT**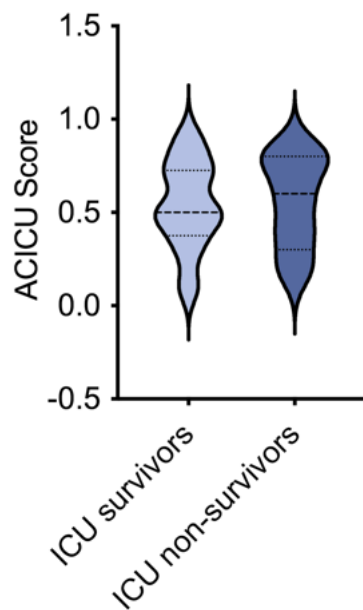

3

4 Comparison of ACICU score values between ICU survivors vs. ICU non-survivors after  
5 OLT out of ACLF (10 vs. 5 patients),  $p = 0.8849$ . An unpaired, two-tailed t-test was  
6 used.

7
